# Supplementary material
Source: publisher figshare collection journal article supplement (https://sage.figshare.com/ndownloader/files/30992323)
Supplement: Supplementary file 1 [file 30992323]

Supplement 1

*Correlation and Covariate Coefficients*

| Parameter Estimates | Time 1 | | Time 2 | |
| --- | --- | --- | --- | --- |
| Correlation Coefficients | Standardized Values (β) | Unstandardized Values (B) | Standardized Values (β) | Unstandardized Values (B) |
| Locomotor skill – Object-Control Skills | .44(.03)* | 1.88(.19)* | .51(.04)* | 2.18(.25)* |
| Locomotor skill – Motor Coordination | .51(.04)* | 2.79(.29)* | .58(.04)* | 3.62(.45)* |
| Object-Control Skills – Motor Coordination | .43(.05)* | 13.23(2.05)* | .45(.05) | 13.29(1.78)* |
| Cardio – Abdominal | .32(.04)* | 114.45(19.59)* | .25(.08)* | 96.99(29.67)* |
| Cardio – Upper Body | .46(.04)* | 82.61(8.87)* | .36(.06)* | 71.84(13.15)* |
| Upper Body – Abdominal | .37(.06)* | 93.36(17.68)* | .42(.05)* | 105.87(16.11)* |
| Intrinsic – Identified | .51(.04)* | .36(.05)* | .52(.04)* | .35(.04)* |
| Intrinsic – Introjected | .13(.08)* | .10(.04)* | .14(.07)* | .11(.04)* |
| Intrinsic – Extrinsic | -.31(.06)* | -.18(.06)* | -.32(.07)* | -.23(.06)* |
| Intrinsic – Amotivation | -.39(.07)* | -.18(.03)* | -.46(.06)* | -.21(.04)* |
| Identified – Introjected | .43(.05)* | .35(.05)* | .14(.07)* | .34(.05)* |
| Identified – Extrinsic | .05(.07) | .04(.05) | -.08(.08) | -.05(.06) |
| Identified – Amotivation | -.13(.07)* | -.06(.02) | -.21(.06)* | -.10(.03)* |
| Introjected – Extrinsic | .40(.06)* | .37(.05)* | .35(.06)* | .28(.06)* |
| Introjected – Amotivation | .17(.08)* | .09(.03)* | .19(.06)* | .10(.03)* |
| Extrinsic – Amotivation | .51(.06)* | .27(.03)* | .57(.05)* | .27(.04)* |
| Enjoyment – Intrinsic | .77(.02)* | .61(.06)* | .78(.03)* | -.29(.05)* |
| Enjoyment – Identified | .38(.05)* | .31(.05)* | .33(.06)* | .26(.05)* |
| Enjoyment – Introjected | .03(.05) | .02(.06) | .06(.06) | .05(.06) |
| Enjoyment – Extrinsic | -.31(.05)* | -.25(.05)* | -.37(.06)* | -.31(.06)* |
| Enjoyment – Amotivation | -.41(.06)* | -.21(.04)* | -.52(.06)* | -.28(.05)* |
|  | Time 1 | | Time 2 | |
| Covariance Coefficients | Standardized Values (*z*) | Unstandardized Values (*r*) | Standardized Values (*z*) | Unstandardized Values (*r*) |
| Gender → MVPA | -.12(.06)**a* | -5.39(2.73)**a* | -.14(.06)* | -.24(.10)* |
| Gender → MVPA in PE | -.06(.06) | -.1.81(.1.78) | -.15(.08) | -3.15(1.66) |
| Gender → Locomotor skill | -.02(.04) | -.04(.08) | -.09(.06) | -.18(.12) |
| Gender → Object-Control Skills | -.25(.04)* | -2.63(.45)* | -.16(.06)* | -1.48(.55)* |
| Gender → Motor Coordination | .13(.04)* | 1.68(.73)* | .13(.05)* | 1.80(.73)* |
| Gender → Cardio | -.20(.05)**a* | -7.43(1.94)**a* | -.05(.05) | -2.00(1.88) |
| Gender → Abdominal | .06(.04) | 3.05(1.89) | .01(.07) | .21(3.19) |
| Gender → Upper Body | .36(.04)**a* | 9.13(1.10)**a* | .29(.05)* | 7.25(1.21)* |
| Gender → Intrinsic | -.15(.05)* | -.26(.09)* | -.18(.04)* | -.30(.08)* |
| Gender → Identified | -.15(.05)* | -.26(.07)* | -.14(.06) | -.24(.10)* |
| Gender → Introjected | .04(.05) | .08(.10) | .01(.07) | .02(.13) |
| Gender → Extrinsic | .02(.06) | .04(.11) | .03(.06) | .06(.13) |
| Gender → Amotivation | .01(.05) | .01(.06) | .07(.07) | .08(.08) |
| Gender → Enjoyment | -.19(05)**a* | -.37(.11)**a* | -.14(.05)* | -.29(.11)* |
| BMI → MVPA | -.03(.04) | -.20(.22) | -.10(.06) | -.19(.19) |
| BMI → MVPA in PE | -.09(.07) | -.39(.32)* | -.04(.05) | -.11(.17) |
| BMI → Locomotor skill | -.28(.05)**a* | -.08(.01)**a* | -.35(.06)* | -.11(.02)* |
| BMI → Object-Control Skills | -.09(.04)**a* | -.15(.07)**a* | -.11(.06) | -.16(.09) |
| BMI → Motor Coordination | -.17(.04)**a* | -.36(.09)**a* | -.30(.06)**a* | -.65(.14)**a* |
| BMI → Cardio | -.43(.04)**a* | -2.52(.20)**a* | -.41(.05)**a* | -2.49(.32)**a* |
| BMI → Abdominal | -.09(.04)* | -.64(.14)* | -.14(.05)**a* | -.94(.38)**a* |
| BMI → Upper Body | -.24(.04)**a* | -.97(.14)**a* | -.30(.05)**a* | -1.17(.19)**a* |
| BMI → Intrinsic | -.08(.04) | -.02(.01) | -.04(.06) | -.01(.02) |
| BMI → Identified | -.06(.05) | -.02(.02) | .03(.05) | .01(.01) |
| BMI → Introjected | .06(.04) | .02(.02) | .03(.06) | .01(.01) |
| BMI → Extrinsic | .10(05) | .03(.02) | .04(.06) | .01(.02) |
| BMI → Amotivation | .04(.05) | .01(.01) | .16(.06)* | .03(.01)* |
| BMI → Enjoyment | -.16(.05) *a* | -.05(.02)**a* | -.08(.06) | -.03(.02) |

*Note. P values * < .05. a indicates that R2 of the dependent variables was a statistically significant. Non-significant R2indicates that predictive strength was not practically meaningful.*
